# Supplementary material for: Computer keyboard interaction as an indicator of early Parkinson’s disease
Source: PubMed Central journal article supplement (PMC5050498; doi:10.1038/srep34468), 2016-10-05
Supplement: srep34468-s1.pdf [file srep34468-s1.pdf]

# Supplementary Material for “Computer keyboard interaction as an indicator of early Parkinson’s disease”

**L. Giancardo<sup>1,†,\*</sup>, A. Sánchez-Ferro<sup>1-5,†</sup>, T. Arroyo-Gallego<sup>1,6</sup>, I. Butterworth<sup>1</sup>, C. S. Mendoza<sup>1</sup>, P. Montero<sup>7</sup>, M. Matarazzo<sup>2-5</sup>, J. A. Obeso<sup>2-4</sup>, M. L. Gray<sup>1,8</sup>, and R. San José Estépar<sup>9</sup>**

<sup>1</sup>Madrid-MIT M+Visión Consortium, Research Laboratory of Electronics, Massachusetts Institute of Technology, Cambridge, MA, USA

<sup>2</sup>HM Hospitales - Centro Integral en Neurociencias HM CINAC, Móstoles, Madrid, Spain

<sup>3</sup>CEU San Pablo University, Campus de Moncloa, Calle Julián Romea, 18, 28003 Madrid, Spain

<sup>4</sup>Centro de Investigación Biomédica en Red, Enfermedades Neurodegenerativas (CIBERNED), Madrid, Spain

<sup>5</sup>Instituto de Investigación Hospital 12 de Octubre (i+12), Madrid, Spain

<sup>6</sup>Universidad Politécnica de Madrid, Spain

<sup>7</sup>Movement disorders unit, Hospital Clinico San Carlos, Madrid, Spain

<sup>8</sup>The Institute of Medical Engineering and Science, Massachusetts Institute of Technology, Cambridge, MA, USA

<sup>9</sup>Brigham and Women’s Hospital, Harvard Medical School, Boston, MA, USA

†L.G. and A.S.F. have contributed equally to this work

\*gianca@mit.edu

## ABSTRACT

Parkinson’s disease (PD) is a slowly progressing neurodegenerative disease with early manifestation of motor signs. Objective measurements of motor signs are of vital importance for diagnosing, monitoring and developing disease modifying therapies, particularly for the early stages of the disease when putative neuroprotective treatments could stop neurodegeneration. Current medical practice has limited tools to routinely monitor PD motor signs with enough frequency and without undue burden for patients and the healthcare system. In this paper, we present data indicating that the routine interaction with computer keyboards can be used to detect motor signs in the early stages of PD. We explore a solution that measures the key hold times (the time required to press and release a key) during the normal use of a computer without any change in hardware and converts it to a PD motor index. This is achieved by the automatic discovery of patterns in the time series of key hold times using an ensemble regression algorithm. This new approach discriminated early PD groups from controls with an AUC=0.81 (n=42/43; mean age=59.0/60.1; women=43%/60%; PD/controls). The performance was comparable or better than two other quantitative motor performance tests used clinically: alternating finger tapping (AUC=0.75) and single key tapping (AUC=0.61).

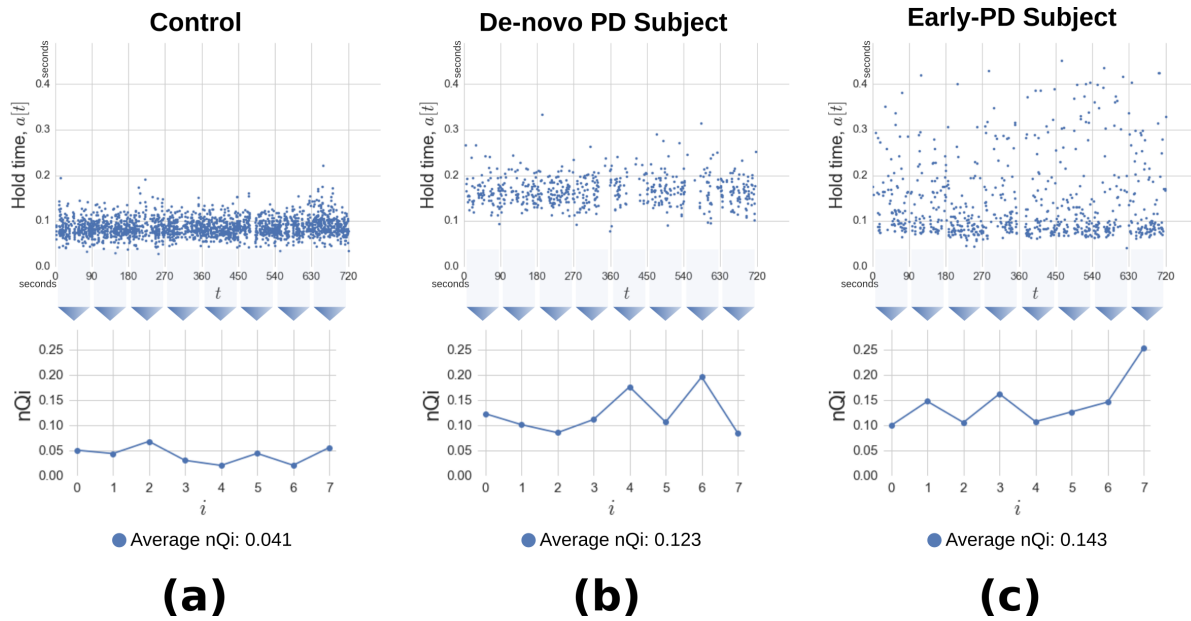

**Figure S.1.** Representative examples of the hold time (HT) time series and derived nQi scores. The HTs were generated from a typing task during which the subject transcribed a folk tale using a standard word processing program. (a) Control subject; (b) De-novo PD subject recently diagnosed with PD and not on any PD medication; (c) Early PD: a subject with PD, who is normally medicated, but has been without medication for 18 hrs prior to testing. The HT series are noticeably more variable in subjects with PD. The distribution and variability features of the HT provide a local nQi metric (as illustrated in Fig. 1); for the three subjects shown here, the average nQi(s) are 0.041, 0.123 and 0.143.

90 sec Samples ● Parkinson's  
● Controls

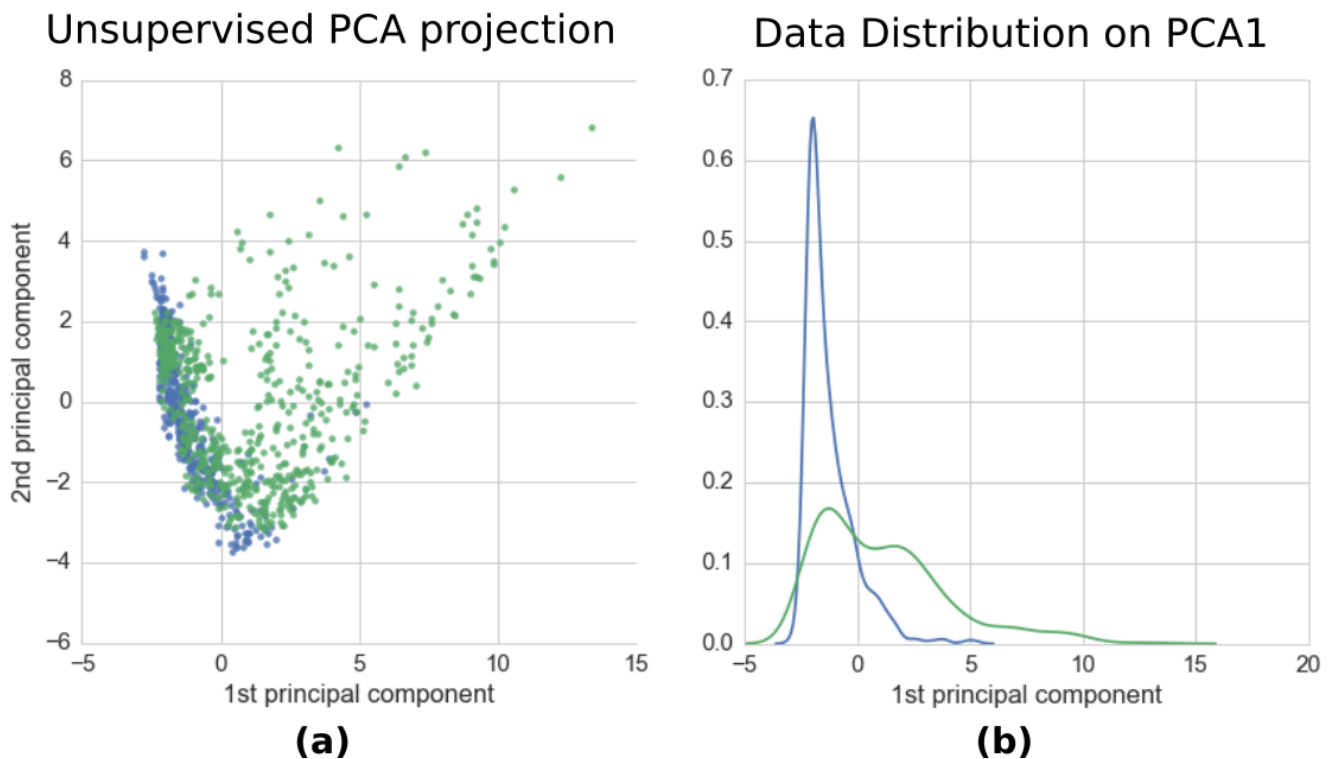

**Figure S.2.** Unsupervised Principal Component Analysis (PCA) on all 1088 feature vectors  $x_i$  of the combined dataset containing 43 controls, 44 PDs. (a) shows the projection of the vectors on the first two PCA components. It can be seen that only the samples coming from the Parkinson's group tend to go toward higher values in the 1st principal component and lower values in the 2nd principal component of PCA space, while the samples from controls appear much less disperse. (b) confirms this observation by showing the two distributions on the first PCA component only. Both PD and control group show a multimodal behavior as confirmed by the Hartigan's dip test. The hypotheses that the two groups follow Gaussian distributions is discarded by the Mardia's Multivariate Normality Test ( $p < 0.001$ ).

**Control (n=43) / PD (n=42)**

|             | coef    | std err | z      | P> z  | [95.0% Conf. Int.] |
|-------------|---------|---------|--------|-------|--------------------|
| intercept   | -2.5104 | 2.260   | -1.111 | 0.267 | -6.941 1.920       |
| sex         | 0.6422  | 0.526   | 1.222  | 0.222 | -0.388 1.672       |
| age         | 0.0055  | 0.029   | 0.189  | 0.850 | -0.051 0.062       |
| typingSpeed | 0.0005  | 0.006   | 0.079  | 0.937 | -0.012 0.013       |
| educ        | 0.0135  | 0.061   | 0.221  | 0.825 | -0.106 0.133       |
| nqScore     | 18.9401 | 5.799   | 3.266  | 0.001 | 7.575 30.306       |

**(a)**

**Control (n=43) / De-novo PD (n=24)**

|             | coef    | std err | z      | P> z  | [95.0% Conf. Int.] |
|-------------|---------|---------|--------|-------|--------------------|
| intercept   | 0.4278  | 3.233   | 0.132  | 0.895 | -5.909 6.765       |
| sex         | 0.3802  | 0.739   | 0.515  | 0.607 | -1.068 1.828       |
| age         | -0.0621 | 0.047   | -1.320 | 0.187 | -0.154 0.030       |
| typingSpeed | -0.0000 | 0.009   | -0.928 | 0.354 | -0.025 0.009       |
| educ        | 0.0665  | 0.087   | 0.769  | 0.442 | -0.103 0.236       |
| nqScore     | 21.4065 | 7.100   | 3.015  | 0.003 | 7.491 35.322       |

**(b)**

**Control (n=43) / Early PD (n=18)**

|             | coef    | std err | z      | P> z  | [95.0% Conf. Int.] |
|-------------|---------|---------|--------|-------|--------------------|
| intercept   | -2.6705 | 2.578   | -1.036 | 0.300 | -7.724 2.383       |
| sex         | 0.5531  | 0.600   | 0.922  | 0.357 | -0.623 1.729       |
| age         | 0.0107  | 0.033   | 0.329  | 0.742 | -0.053 0.074       |
| typingSpeed | -0.0001 | 0.007   | -0.017 | 0.987 | -0.014 0.014       |
| educ        | 0.0160  | 0.067   | 0.240  | 0.810 | -0.115 0.147       |
| nqScore     | 11.5481 | 5.049   | 2.287  | 0.022 | 1.653 21.443       |

**(c)**

**Figure S.3.** Logistic regression tests using the subject status (PD or control) as dependent variable with the combined dataset and two patient subgroups. The following independent variables are used: sex, age, typing speed (typing skills), years of education and nQi (nqScore). In all models (a,b,c), nQi showed statistical relevance.

**Typing Speed  
Control (n=43) / PD (n=42)**

|             | coef    | std err | z      | P> z  | [95.0% Conf. Int.] |
|-------------|---------|---------|--------|-------|--------------------|
| intercept   | 1.9517  | 1.770   | 1.103  | 0.270 | -1.517 5.421       |
| sex         | 0.6577  | 0.463   | 1.422  | 0.155 | -0.249 1.565       |
| age         | -0.0295 | 0.025   | -1.169 | 0.242 | -0.079 0.020       |
| educ        | 0.0210  | 0.056   | 0.372  | 0.710 | -0.090 0.131       |
| typingSpeed | -0.0081 | 0.005   | -1.497 | 0.135 | -0.019 0.003       |

**(a)**

**Alternated Finger Tapping  
Control (n=37) / PD (n=39)**

|           | coef    | std err | z      | P> z  | [95.0% Conf. Int.] |
|-----------|---------|---------|--------|-------|--------------------|
| intercept | 12.8277 | 3.588   | 3.575  | 0.000 | 5.794 19.861       |
| sex       | 0.0820  | 0.616   | 0.133  | 0.894 | -1.126 1.290       |
| age       | -0.0864 | 0.034   | -2.522 | 0.012 | -0.154 -0.019      |
| educ      | 0.0070  | 0.064   | 0.110  | 0.912 | -0.118 0.133       |
| afTap     | -0.0699 | 0.016   | -4.259 | 0.000 | -0.102 -0.038      |

**(b)**

**Single Key Tapping  
Control (n=43) / PD (n=42)**

|           | coef    | std err | z      | P> z  | [95.0% Conf. Int.] |
|-----------|---------|---------|--------|-------|--------------------|
| intercept | 5.5694  | 2.827   | 1.970  | 0.049 | 0.028 11.111       |
| sex       | 0.9384  | 0.479   | 1.957  | 0.050 | -0.001 1.878       |
| age       | -0.0253 | 0.023   | -1.077 | 0.281 | -0.071 0.021       |
| educ      | -0.0115 | 0.050   | -0.230 | 0.818 | -0.110 0.087       |
| sTap      | -0.0261 | 0.012   | -2.113 | 0.035 | -0.050 -0.002      |

**(c)**

**Figure S.4.** Logistic regression tests using the subject status (PD or control) as dependent variable and the following independent variables: sex, age, years of education and the metric to be tested. (a) Testing for group discrimination of typing speed; (b) testing group discrimination of alternated finger tapping. This test was introduced with the study on-going, because of this 5 PD subjects and 4 controls could only be measured with the single key tapping test and our typing test; (c) testing group discrimination of single key tapping.

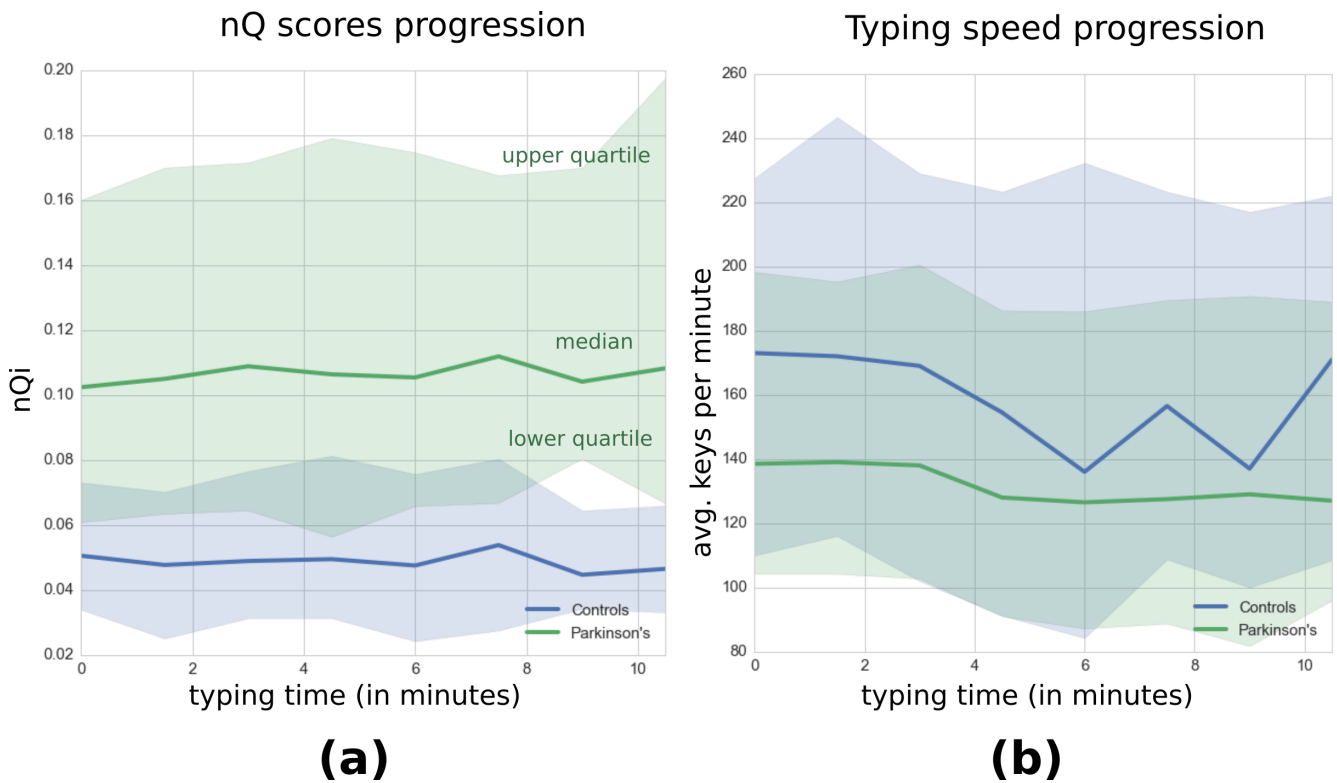

**Figure S.5.** Group level comparison of typing progression from the combined dataset (42 PD and 43 controls). The solid lines represent the group medians and the shadows the upper/lower quartiles. Medians and quartiles are computed with 90 seconds non-overlapping temporal windows. No temporal smoothing was performed. (a) Group nQi scores during the typing task. The grouped nQi medians appear stable and they are able to discriminate PD from groups also assuming independent 90 seconds windows (AUC 0.79, 0.76-0.82 95% CI). (b) Typing speed, the main measure of typing skills, using the same data employed to compute the nQi scores shown on the left. Typing speed alone is very poor at distinguishing the groups also assuming independent 90 seconds windows (AUC 0.58, 0.54-0.62 95% CI).

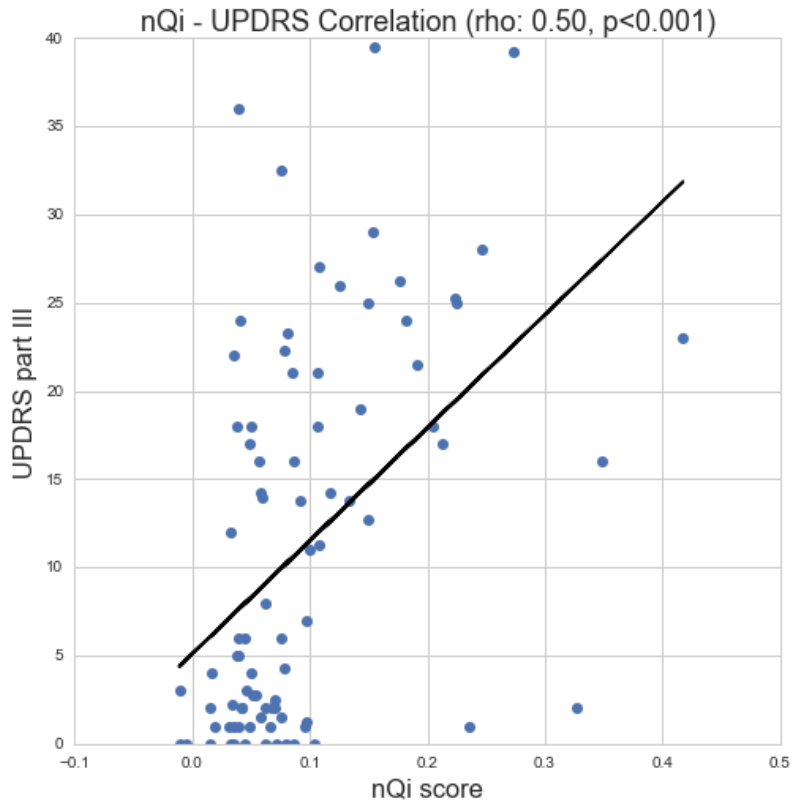

**Figure S.6.** Correlation between the clinical scores for UPDRS-III and nQi on the combined dataset of 42 PD subjects and 43 controls. nQi showed a moderate correlation with UPDRS-III (Spearman rho=0.50; p<0.001). Note that the dataset used does not represent the whole spectrum of PD, therefore the correlation found should be taken with care.

| Subject ID | Group | Avg. UPDRS-III (0-108) | Avg. ATF | Avg. SKT | Avg. nQi | Typing Speed (# of keys per min) |
|------------|-------|------------------------|----------|----------|----------|----------------------------------|
| 11         | PD    | 14.25                  | NaN      | 162.25   | 0.118    | 189.4                            |
| 60         | CNT   | 2                      | NaN      | 162.25   | 0.070    | 60.5                             |
| 67         | PD    | 25.25                  | NaN      | 133.75   | 0.223    | 54.3                             |
| 68         | CNT   | 6                      | NaN      | 159      | 0.075    | 71.8                             |
| 70         | PD    | 26.25                  | NaN      | 113.5    | 0.176    | 39.6                             |
| 71         | PD    | 13.75                  | 132.5    | 153      | 0.133    | 106.3                            |
| 72         | PD    | 17                     | NaN      | 146.75   | 0.212    | 79.1                             |
| 73         | PD    | 23.25                  | 99.25    | 164.25   | 0.080    | 115.5                            |
| 74         | PD    | 11.25                  | NaN      | 175.5    | 0.108    | 186.1                            |
| 75         | PD    | 12.75                  | 79.25    | 158.75   | 0.149    | 176.1                            |
| 76         | CNT   | 0                      | 136.75   | 177      | 0.086    | 249.7                            |
| 77         | CNT   | 2.25                   | NaN      | 150      | 0.035    | 79.7                             |
| 78         | PD    | 39.25                  | 49.5     | 191.75   | 0.273    | 85.0                             |
| 79         | CNT   | 1.25                   | 148.75   | 173.75   | 0.097    | 82.5                             |
| 80         | PD    | 39.5                   | 92       | 125.5    | 0.155    | 70.7                             |
| 81         | CNT   | 4.25                   | NaN      | 158      | 0.078    | 57.5                             |
| 82         | PD    | 32.5                   | 96       | 196.75   | 0.075    | 33.5                             |
| 83         | CNT   | 2.75                   | 152      | 164.5    | 0.052    | 110.7                            |
| 84         | PD    | 22.25                  | 97.75    | 156.25   | 0.078    | 99.9                             |
| 85         | CNT   | 2.5                    | 107.75   | 159.5    | 0.070    | 104.1                            |
| 86         | PD    | 14.25                  | 114.75   | 133.25   | 0.058    | 119.8                            |
| 87         | CNT   | 2.75                   | 118.25   | 140.5    | 0.054    | 188.0                            |
| 88         | PD    | 13.75                  | 95       | 157      | 0.091    | 105.2                            |
| 89         | CNT   | 0                      | 144.25   | 164.5    | 0.080    | 149.3                            |
| 92         | PD    | 21.5                   | 101.25   | 145      | 0.191    | 81.0                             |
| 93         | PD    | 21                     | 116      | 190.75   | 0.107    | 80.9                             |
| 94         | CNT   | 4                      | 142      | 157.25   | 0.050    | 85.5                             |
| 95         | CNT   | 1.5                    | 213      | 181.75   | 0.075    | 188.8                            |
| 97         | PD    | 25                     | 92       | 188.75   | 0.150    | 97.0                             |
| 98         | PD    | 29                     | 87       | 176.75   | 0.153    | 59.9                             |

**Table S.1.** Data summary for the Early-PD dataset. UPDRS-III: Unified Parkinson’s Rating Scale part III; ATF: alternated finger tapping (when NaN the information is not available); SKT: single key tapping.

| Subject ID | Group | Avg. UPDRS-III<br>(0-108) | Avg. ATF | Avg. SKT | Avg. nQi | Typing Speed<br>(# of keys per min) |
|------------|-------|---------------------------|----------|----------|----------|-------------------------------------|
| 1000       | PD    | 27                        | 79       | 184.5    | 0.107    | 56.9                                |
| 1001       | PD    | 16                        | 96.5     | 189      | 0.056    | 118.0                               |
| 1002       | CNT   | 5                         | 140      | 158      | 0.040    | 119.0                               |
| 1004       | PD    | 22                        | 83.5     | 191.5    | 0.035    | 74.3                                |
| 1005       | PD    | 17                        | 68       | 150      | 0.048    | 75.0                                |
| 1006       | PD    | 18                        | 93       | 140.5    | 0.038    | 112.9                               |
| 1008       | PD    | 18                        | 130      | 169      | 0.051    | 182.1                               |
| 1009       | PD    | 19                        | 82.5     | 176      | 0.143    | 64.7                                |
| 1010       | CNT   | 2                         | 135      | 197.5    | 0.042    | 172.3                               |
| 1011       | CNT   | 1                         | 120      | 174.5    | 0.035    | 97.1                                |
| 1012       | CNT   | 4                         | 172.5    | 190.5    | 0.016    | 128.4                               |
| 1013       | CNT   | 1                         | 126      | 177.5    | 0.096    | 126.1                               |
| 1014       | PD    | 24                        | 96       | 170      | 0.182    | 100.2                               |
| 1015       | CNT   | 2                         | 117.5    | 201.5    | 0.041    | 65.8                                |
| 1016       | CNT   | 6                         | 167.5    | 195.5    | 0.045    | 174.6                               |
| 1017       | PD    | 23                        | 61       | 150.5    | 0.417    | 30.7                                |
| 1019       | PD    | 7                         | 94       | 164.5    | 0.097    | 121.5                               |
| 1020       | PD    | 18                        | 119      | 160      | 0.106    | 90.6                                |
| 1021       | CNT   | 0                         | 96.5     | 163.5    | 0.045    | 78.7                                |
| 1022       | CNT   | 2                         | 142      | 179      | 0.067    | 131.0                               |
| 1023       | PD    | 11                        | 117.5    | 144      | 0.100    | 138.0                               |
| 1024       | PD    | 14                        | 122.5    | 170      | 0.059    | 153.1                               |
| 1025       | PD    | 18                        | 131.5    | 174      | 0.205    | 49.6                                |
| 1028       | PD    | 24                        | 110.5    | 200.5    | 0.041    | 119.6                               |
| 1029       | CNT   | 2                         | 161.5    | 172.5    | 0.062    | 61.2                                |
| 1030       | CNT   | 3                         | 152.5    | 190.5    | 0.046    | 163.1                               |
| 1031       | CNT   | 1                         | 121      | 179      | 0.031    | 178.3                               |
| 1032       | CNT   | 6                         | 149.5    | 182      | 0.040    | 101.4                               |
| 1033       | CNT   | 1                         | 111      | 169      | 0.040    | 84.7                                |
| 1034       | PD    | 36                        | 58.5     | 174      | 0.039    | 149.7                               |
| 1035       | CNT   | 1                         | 120.5    | 195.5    | 0.019    | 65.3                                |
| 1037       | PD    | 21                        | 65.5     | 156.5    | 0.085    | 81.2                                |
| 1039       | CNT   | 0                         | 141.5    | 167      | -0.011   | 170.7                               |
| 1041       | PD    | 16                        | 74       | 186      | 0.349    | 40.4                                |
| 1042       | CNT   | 0                         | 145      | 175.5    | 0.035    | 234.9                               |
| 1043       | CNT   | 3                         | 101.5    | 191      | -0.011   | 68.1                                |
| 1045       | CNT   | 1                         | 131      | 174.5    | 0.048    | 137.6                               |
| 1047       | PD    | 25                        | 106.5    | 137      | 0.225    | 35.8                                |
| 1049       | CNT   | 1                         | 84       | 123.5    | 0.066    | 114.7                               |
| 1050       | CNT   | 5                         | 129.5    | 170.5    | 0.038    | 51.2                                |
| 1051       | CNT   | 1                         | 89       | 138.5    | 0.235    | 26.4                                |
| 1052       | PD    | 16                        | 128      | 213      | 0.086    | 152.8                               |
| 1053       | CNT   | 0                         | 90       | 178.5    | 0.032    | 42.5                                |
| 1055       | CNT   | 0                         | 126.5    | 167.5    | 0.104    | 21.8                                |
| 1056       | CNT   | 0                         | 162      | 188      | 0.062    | 257.2                               |
| 1057       | CNT   | 0                         | 66.5     | 157.5    | 0.072    | 23.8                                |
| 1059       | PD    | 8                         | 100.5    | 162.5    | 0.062    | 91.4                                |
| 1061       | CNT   | 0                         | 120.5    | 157      | 0.015    | 109.0                               |
| 1062       | CNT   | 2                         | 115.5    | 179      | 0.326    | 140.5                               |
| 1063       | CNT   | 0                         | 110      | 170      | -0.006   | 109.8                               |
| 1064       | PD    | 28                        | 75.5     | 140      | 0.247    | 105.3                               |
| 1066       | PD    | 12                        | 118      | 170.5    | 0.033    | 140.3                               |
| 1068       | PD    | 26                        | 65.5     | 98       | 0.126    | 48.8                                |
| 1070       | CNT   | 2                         | 126      | 154.5    | 0.015    | 54.9                                |

**Table S.2.** Data summary for the Early-PD dataset. UPDRS-III: Unified Parkinson’s Rating Scale part III; ATF: alternated finger tapping (when NaN the information is not available); SKT: single key tapping.
